# Supplementary material for: Real-world effectiveness of a single conventional disease-modifying anti-rheumatic drug (cDMARD) plus an anti-TNF agent versus multiple cDMARDs in rheumatoid arthritis: a prospective observational study
Source: PubMed Central journal article supplement — J Rheum Dis. 2024 Jan 29;31(2):86–96. doi: 10.4078/jrd.2023.0045 (PMC10973349; doi:10.4078/jrd.2023.0045), 2024-01-29
Supplement: jrd-31-2-86-supple.pdf [file jrd-31-2-86-supple.pdf]

**Supplementary Table 1.** Summary of the number of patients by treatment site

| Site/Institutional Review Board (IRB) approval                                                                     | Enrolled   | cDMARD+anti-TNF (n=73) |                  | Multiple cDMARDs (n=134) |                  | Total (n=207)     |                  |
|--------------------------------------------------------------------------------------------------------------------|------------|------------------------|------------------|--------------------------|------------------|-------------------|------------------|
|                                                                                                                    |            | Complete               | Discont          | Complete                 | Discont          | Complete          | Discont          |
| Konkuk University Medical Center/<br>Konkuk University Medical Center<br>(KUH1010880)                              | 7          | 1 (14.3)               | 1 (14.3)         | 2 (28.6)                 | 3 (42.9)         | 3 (42.9)          | 4 (57.1)         |
| Samsung Medical Center/Samsung<br>Medical Center (SMC 2017-06-046)                                                 | 4          | 0 (0)                  | 0 (0)            | 2 (50.0)                 | 2 (50.0)         | 2 (50.0)          | 2 (50.0)         |
| Hanyang University Medical Center/<br>Hanyang University Medical Center<br>(HYUH 2017-06-008)                      | 23         | 12 (52.2)              | 2 (8.7)          | 8 (34.8)                 | 1 (4.4)          | 20 (87.0)         | 3 (13.0)         |
| Inje University Ilsan Paik Hospital/<br>Inje University Ilsan Paik Hospital<br>(ISPAIK 2017-06-004)                | 4          | 0 (0)                  | 1 (25.0)         | 2 (50.0)                 | 1 (25.0)         | 2 (50.0)          | 2 (50.0)         |
| Gangnam Severance Hospital/Gangnam<br>Severance Hospital (3-2017-0262)                                             | 1          | 0 (0)                  | 0 (0)            | 0 (0)                    | 1 (100.0)        | 0 (0)             | 1 (100.0)        |
| Hanyang University Guri Hospital/<br>Hanyang University Guri Hospital<br>(GURI 2017-06-013)                        | 9          | 1 (11.1)               | 0 (0)            | 7 (77.8)                 | 1 (11.1)         | 8 (88.9)          | 1 (11.1)         |
| Pusan National University Hospital/<br>Pusan National University Hospital<br>(H-1707-018-057)                      | 1          | 0 (0)                  | 0 (0)            | 1 (100.0)                | 0 (0)            | 1 (100.0)         | 0 (0)            |
| Inje University Busan Paik Hospital/<br>Inje University Busan Paik Hospital<br>(17-0095)                           | 25         | 6 (24.0)               | 4 (16.0)         | 7 (28.0)                 | 8 (32.0)         | 13 (52.0)         | 12 (48.0)        |
| Pusan National University Yangsan<br>Hospital/Pusan National University<br>Yangsan Hospital (02-2017-020)          | 50         | 6 (12.0)               | 7 (14.0)         | 28 (56.0)                | 9 (18.0)         | 34 (68.0)         | 16 (32.0)        |
| Keimyung University Dongsan Hospital/<br>Keimyung University Dongsan Hospital<br>(DSMC 2017-06-025)                | 35         | 7 (20.0)               | 2 (5.7)          | 16 (45.7)                | 10 (28.6)        | 23 (65.7)         | 12 (34.3)        |
| Daegu Catholic University Medical<br>Center/Daegu Catholic University<br>Medical Center (CR-17-067-L)              | 17         | 3 (17.7)               | 2 (11.8)         | 10 (58.8)                | 2 (11.8)         | 13 (76.5)         | 4 (23.5)         |
| Inje University Haeundae Paik Hospital/<br>Inje University Haeundae Paik Hospital<br>(HPIRB 2017-06-015)           | 3          | 0 (0)                  | 0 (0)            | 3 (100.0)                | 0 (0)            | 3 (100.0)         | 0 (0)            |
| Nowon Eulji Medical Center, Eulji<br>University/Nowon Eulji Medical Center,<br>Eulji University (EMCS 2017-06-013) | 11         | 4 (36.4)               | 1 (9.1)          | 6 (54.6)                 | 0 (0)            | 10 (90.9)         | 1 (9.1)          |
| Dong-A University Hospital/Dong-A<br>University Hospital (DAUHIB-17-177)                                           | 1          | 0 (0)                  | 0 (0)            | 0 (0)                    | 1 (100.0)        | 0 (0)             | 1 (100.0)        |
| Gyeongsang National University<br>Hospital/Gyeongsang National<br>University Hospital<br>(GNUH 2017-08-002)        | 16         | 7 (43.8)               | 6 (37.5)         | 3 (18.8)                 | 0 (0)            | 10 (62.5)         | 6 (37.5)         |
| <b>Total (15 treatment sites)</b>                                                                                  | <b>207</b> | <b>47 (64.4)</b>       | <b>26 (35.6)</b> | <b>95 (70.9)</b>         | <b>39 (29.1)</b> | <b>142 (68.6)</b> | <b>65 (31.4)</b> |

Values are presented as number only or number (%). Percentages are based on the number of patients enrolled at each treatment site. cDMARD: conventional disease-modifying anti-rheumatic drug, TNF: tumor necrosis factor, Complete: completed study, Discont: discontinued study.

**Supplementary Table 2.** Medications taken to treat rheumatoid arthritis during the study (per-protocol set)

| Concomitant medication                | cDMARD+anti-TNF<br>(n=45) | Multiple cDMARDs<br>(n=91) | p-value |
|---------------------------------------|---------------------------|----------------------------|---------|
| cDMARDs                               |                           |                            |         |
| Methotrexate                          | 42 (93.3)                 | 79 (86.8)                  | 0.384   |
| Leflunomide                           | 0 (0)                     | 39 (42.9)                  | <0.001  |
| Tacrolimus                            | 0 (0)                     | 45 (49.1)                  | <0.001  |
| Ciclosporin                           | 0 (0)                     | 1 (1.1)                    | <0.001  |
| Anti-TNF agents                       |                           |                            |         |
| Adalimumab                            | 28 (62.2)                 | 0 (0)                      | <0.001  |
| Etanercept                            | 9 (20.0)                  | 0 (0)                      | <0.001  |
| Golimumab                             | 4 (8.9)                   | 0 (0)                      | <0.001  |
| Infliximab                            | 4 (8.9)                   | 0 (0)                      | <0.001  |
| Systemic corticosteroids              |                           |                            |         |
| Methylprednisolone                    | 11 (24.4)                 | 45 (49.5)                  | 0.009   |
| Prednisolone                          | 18 (40.0)                 | 22 (24.2)                  | 0.088   |
| Triamcinolone                         | 7 (15.6)                  | 18 (19.8)                  | 0.716   |
| Dexamethasone                         | 1 (2.2)                   | 2 (2.2)                    | >0.999  |
| Deflazacort                           | 0 (0.00)                  | 1 (1.1)                    | <0.001  |
| Musculoskeletal system agents         |                           |                            |         |
| Celecoxib                             | 27 (60.0)                 | 50 (54.9)                  | 0.707   |
| Nabumetone                            | 2 (4.4)                   | 5 (5.5)                    | >0.999  |
| Aceclofenac                           | 3 (6.7)                   | 5 (5.5)                    | >0.999  |
| Meloxicam                             | 3 (6.7)                   | 4 (4.4)                    | 0.685   |
| Naproxen and esomeprazole             | 1 (2.2)                   | 3 (3.3)                    | >0.999  |
| Naproxen                              | 2 (4.4)                   | 0 (0.0)                    | 0.108   |
| Other                                 | 6 (13.3)                  | 6 (6.9)                    | 0.211   |
| Bucillamine                           | 0 (0.0)                   | 3 (3.3)                    | 0.551   |
| Avocado/soyabean oil, unsaponifiables | 1 (2.2)                   | 0 (0.0)                    | 0.331   |
| Risedronic acid                       | 1 (2.2)                   | 0 (0.0)                    | 0.331   |

Values are presented as number (%). Anti-TNF: anti-tumor necrosis factor agent, cDMARD: conventional disease-modifying anti-rheumatic drug.
